# Supplementary material for: Solvent-Induced Formation of Novel Ni(II) Complexes Derived from Bis-Thiosemicarbazone Ligand: An Insight from Experimental and Theoretical Investigations
Source: MDPI journal article supplement (doi:10.3390/ijms22105337), 2021-05-19
Supplement: s1 [file s1]

# Supporting Information

## Solvent-induced Formation of Novel Ni(II) Complexes Derived from Bis-Thiosemicarbazone Ligand: An Insight from Experimental and Theoretical Investigations

Ghodrat Mahmoudi <sup>1,\*</sup>, Maria G. Babashkina <sup>2</sup>, Waldemar Maniukiewicz <sup>3,\*</sup>, Farhad Akbari Afkhami <sup>4</sup>, Bharath Babu Nunna <sup>5</sup>, Fedor I. Zubkov <sup>6</sup>, Aleksandra L. Ptaszek <sup>7</sup>, Dariusz W. Szczepanik <sup>7</sup>, Mariusz P. Mitoraj <sup>7,\*</sup> and Damir A. Safin <sup>8,9,10,\*</sup>

<sup>1</sup> Department of Chemistry, Faculty of Science, University of Maragheh, P.O. Box 55181-83111, Maragheh, Iran; ghodratmahmoudi@gmail.com

<sup>2</sup> Institute of Condensed Matter and Nanosciences, Université Catholique de Louvain, Place L. Pasteur 1, 1348 Louvain-la-Neuve, Belgium; maria.babashkina@gmail.com

<sup>3</sup> Institute of General and Ecological Chemistry, Lodz University of Technology, Żeromskiego 116, 90-924 Łódź, Poland; waldemar.maniukiewicz@p.lodz.pl

<sup>4</sup> Department of Chemistry, The University of Alabama, Box 870336, 250 Hackberry Lane, Tuscaloosa, Alabama 35487, USA; f.a.afkhami@gmail.com

<sup>5</sup> Department of Mechanical and Industrial Engineering, New Jersey Institute of Technology, University Heights, Newark, NJ 07102, USA; bn63@njit.edu

<sup>6</sup> Organic Chemistry Department, Faculty of Science, Peoples' Friendship University of Russia (RUDN University), Miklukho-Maklaya Str. 6, Moscow, 117198, Russian Federation; fzubkov@sci.pfu.edu.ru

<sup>7</sup> Department of Theoretical Chemistry, Faculty of Chemistry, Jagiellonian University, Gronostajowa 2, 30-387 Cracow, Poland; aleksandra.ptaszek6@gmail.com (A.L.P.); dszczpnk@gmail.com (D.W.S.),

<sup>8</sup> University of Tyumen, Volodarskogo Str. 6, 625003 Tyumen, Russian Federation

<sup>9</sup> Innovation Center for Chemical and Pharmaceutical Technologies, Ural Federal University named after the First President of Russia B.N. Eltsin, Mira Str. 19, Ekaterinburg, 620002, Russian Federation

<sup>10</sup> Kurgan State University, Sovetskaya Str. 63/4, 640020, Russian Federation

\* Correspondence: ghodratmahmoudi@gmail.com (G.M.); waldemar.maniukiewicz@p.lodz.pl (W.M.); mitoraj@chemia.uj.edu.pl (M.P.M.), mitoraj@chemia.uj.edu.pl (M.P.M.); damir.a.safin@gmail.com (D.A.S.)

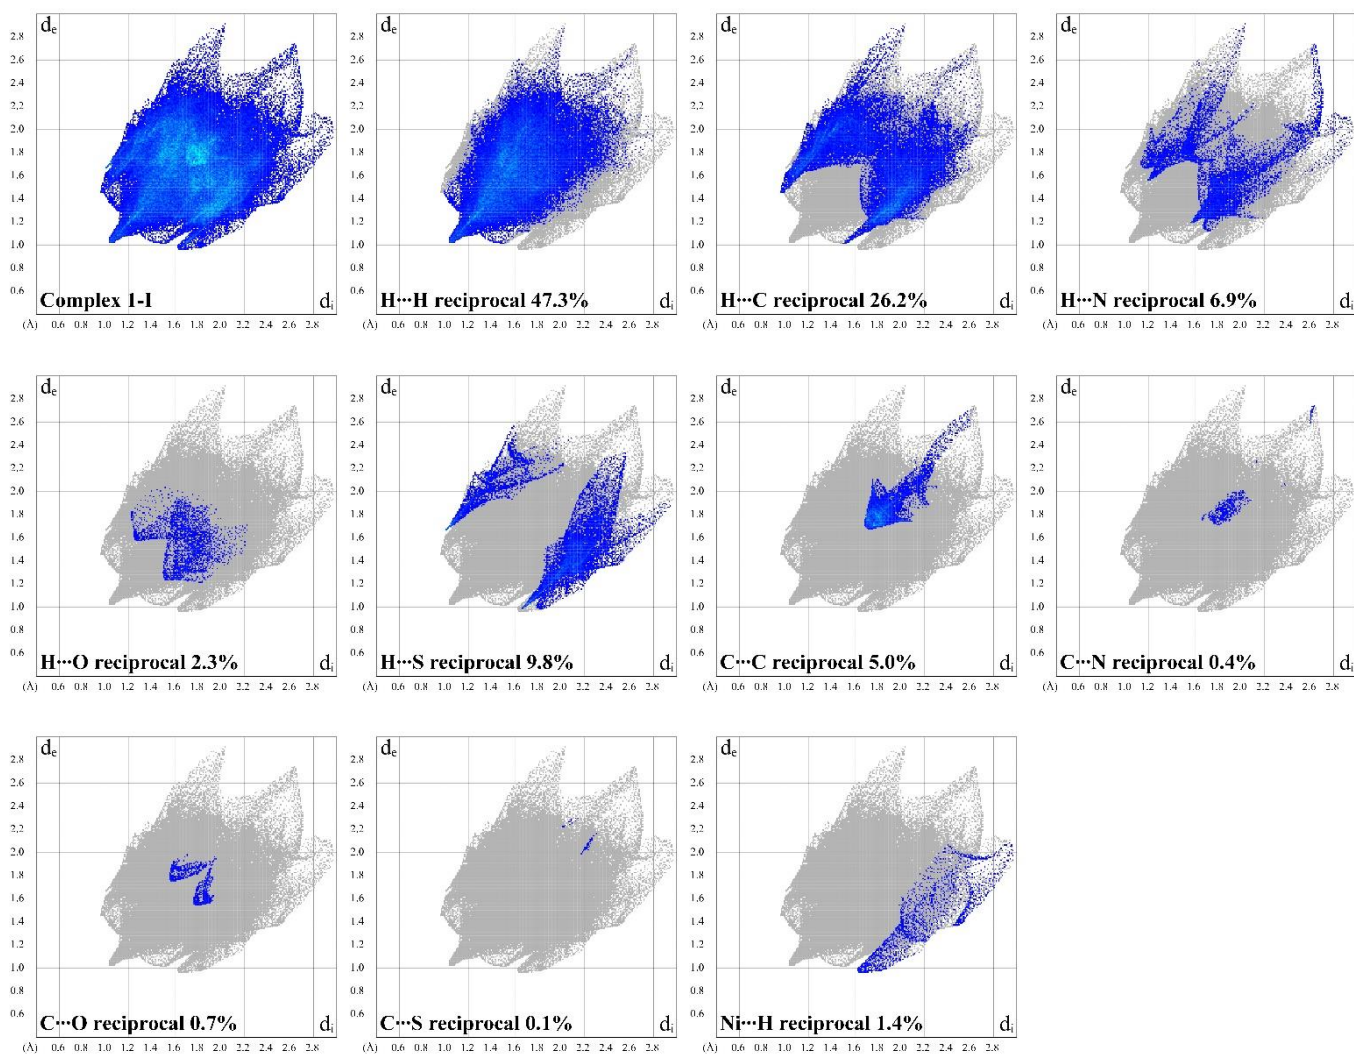

**Figure S1.** 2D and decomposed 2D fingerprint plots of observed contacts for 1-I.

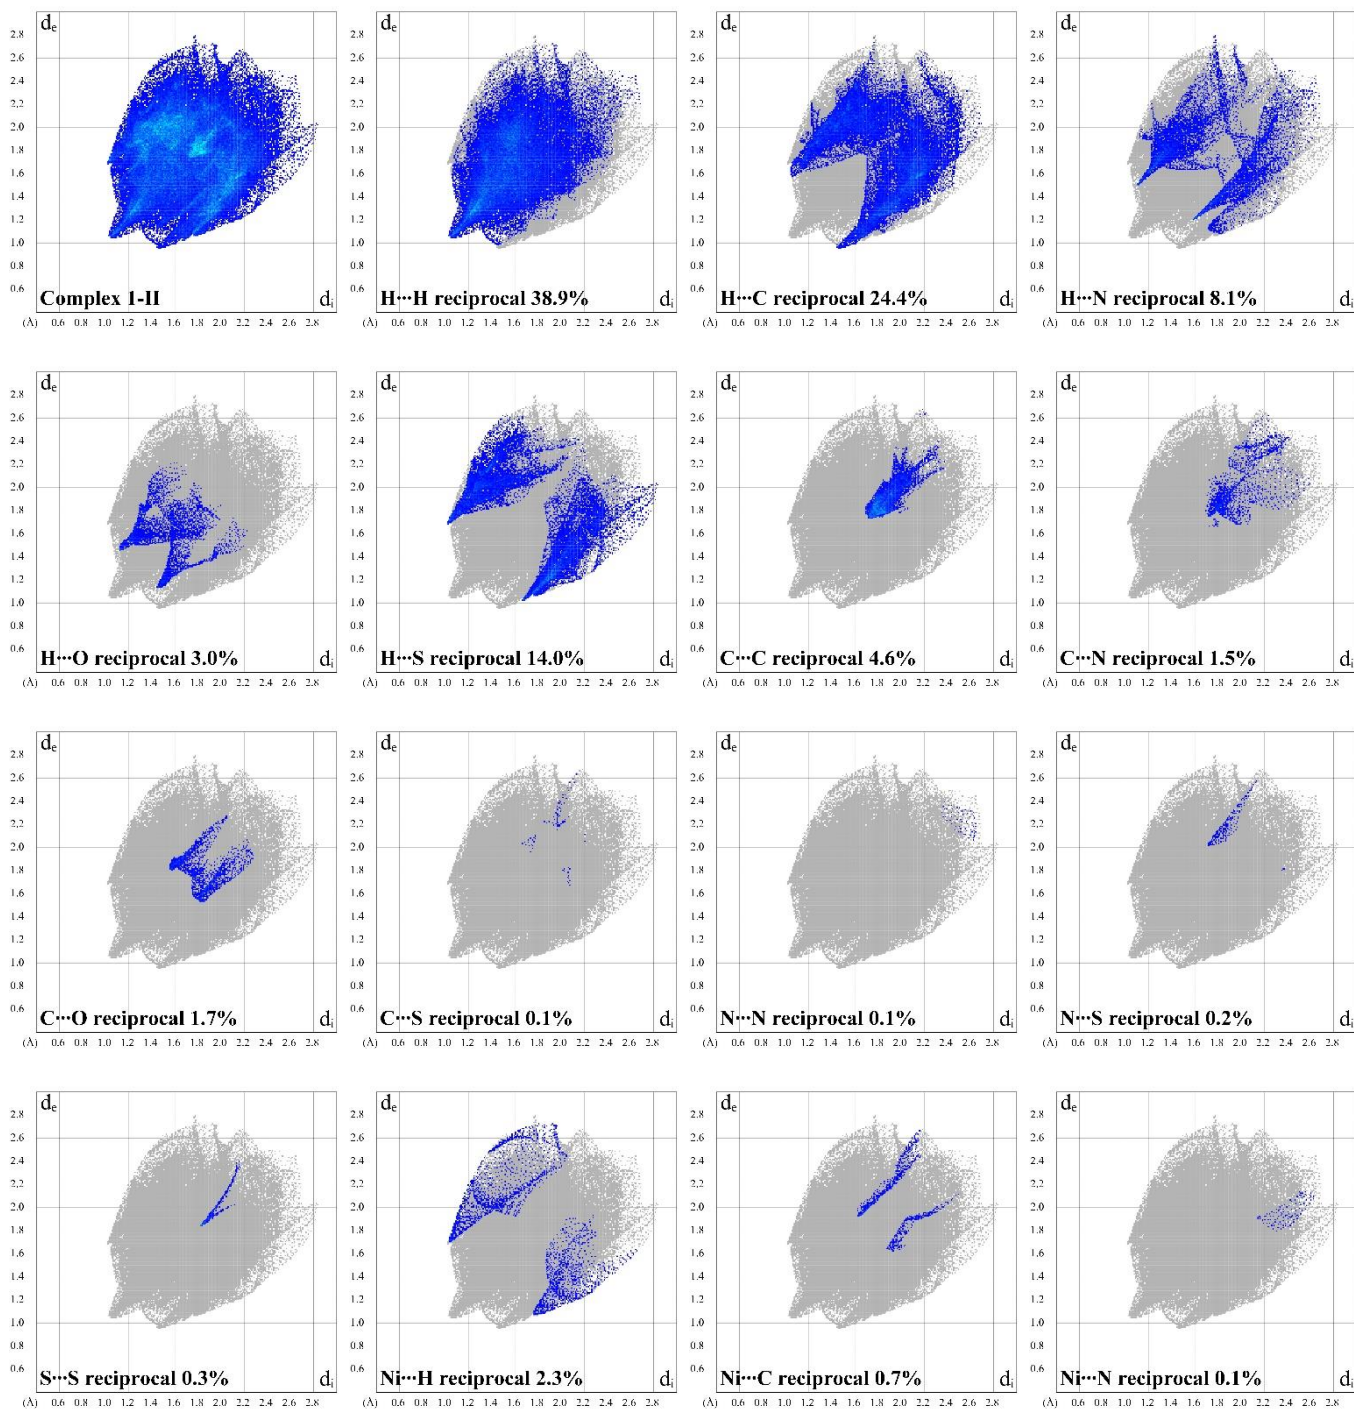

**Figure S2.** 2D and decomposed 2D fingerprint plots of observed contacts for 1-II.

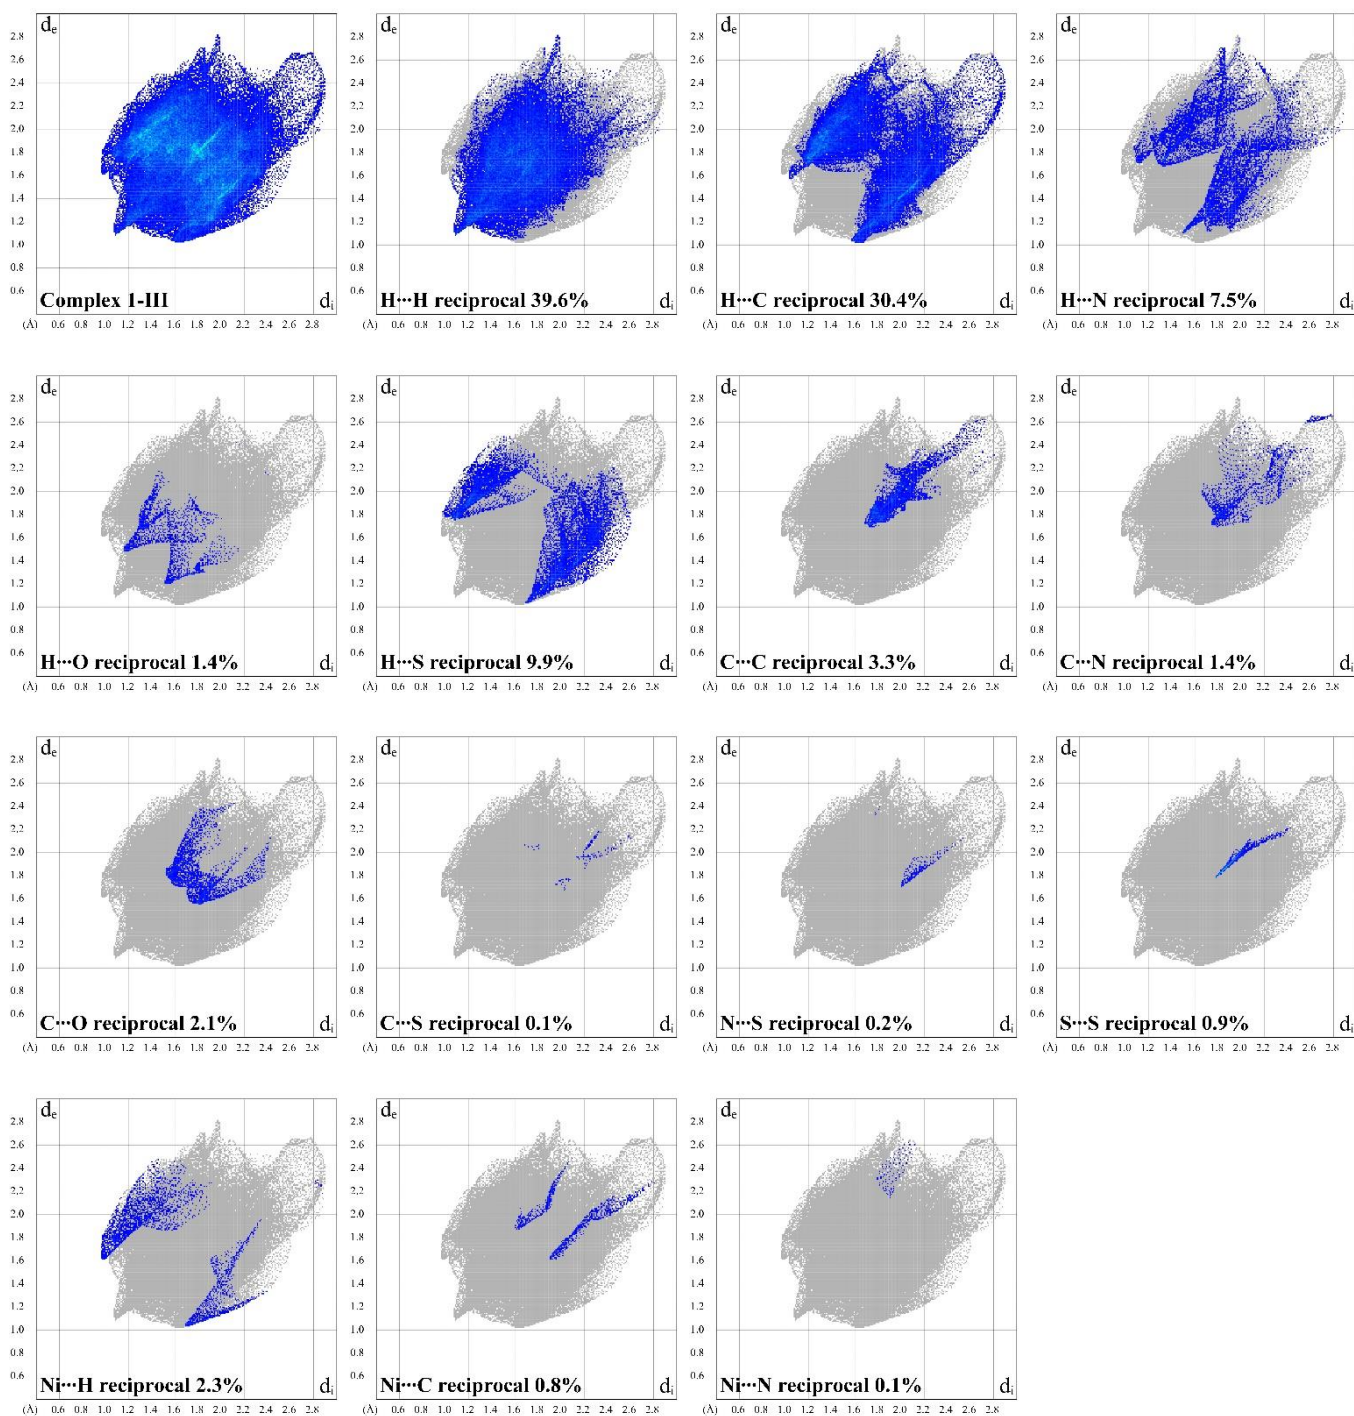

Figure S3. 2D and decomposed 2D fingerprint plots of observed contacts for 1-III.

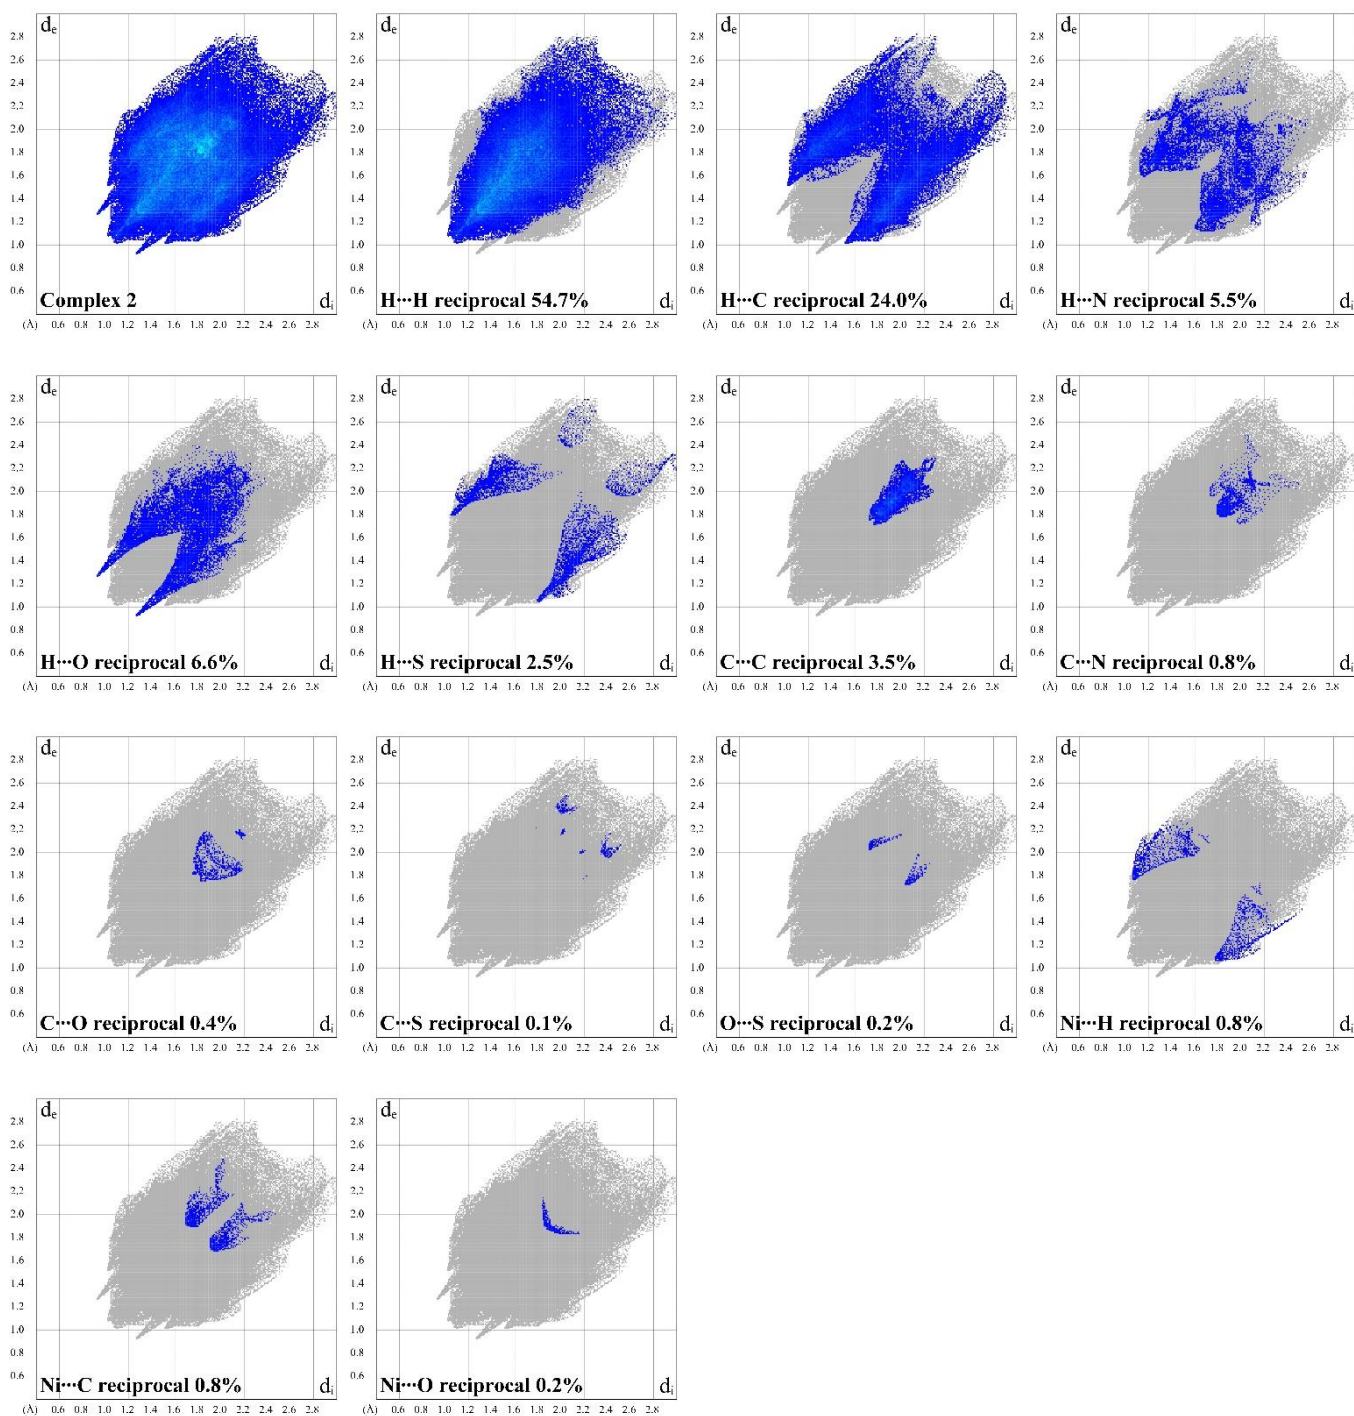

**Figure S4.** 2D and decomposed 2D fingerprint plots of observed contacts for 2.
